# Supplementary material for: Cerebrospinal fluid volumetric net flow rate and direction in idiopathic normal pressure hydrocephalus
Source: PubMed Central journal article supplement — Neuroimage Clin. 2018 Sep 14;20:731–41. doi: 10.1016/j.nicl.2018.09.006 (PMC6154456; doi:10.1016/j.nicl.2018.09.006), 2018-09-14
Supplement: mmc3.pdf [file mmc3.pdf]

## Supplementary Material

### Cerebrospinal fluid volumetric net flow rate and direction in idiopathic normal pressure hydrocephalus

Erika Kristina Lindstrøm<sup>1#</sup>, Geir Ringstad<sup>2,3#</sup>, Kent-Andre Mardal<sup>1,4</sup>, Per Kristian Eide<sup>3,5</sup>

<sup>1</sup>Department of Mathematics, Faculty of Mathematics and Natural Sciences, University of Oslo, Norway. <sup>2</sup>Division of Radiology and Nuclear Medicine, Department of Radiology, Oslo University Hospital - Rikshospitalet, Oslo, Norway. <sup>3</sup>Institute of Clinical Medicine, Faculty of Medicine, University of Oslo, Oslo, Norway. <sup>4</sup>Department of Numerical Analysis and Scientific Computing, Simula Research Laboratory, Oslo, Norway; <sup>5</sup>Department of Neurosurgery, Oslo University Hospital, Rikshospitalet, Oslo, Norway.

<sup>#</sup>These authors contributed equally to this work.

#### ***Corresponding author:***

Per Kristian Eide, MD PhD  
Professor/Section chief  
Department of Neurosurgery  
Oslo University Hospital - Rikshospitalet  
Pb 4950 Nydalen,  
N-0424 Oslo, Norway  
Phone: +47-23074321. Fax: +47-23074310  
[p.k.eide@medisin.uio.no](mailto:p.k.eide@medisin.uio.no) / [peide@ous-hf.no](mailto:peide@ous-hf.no)

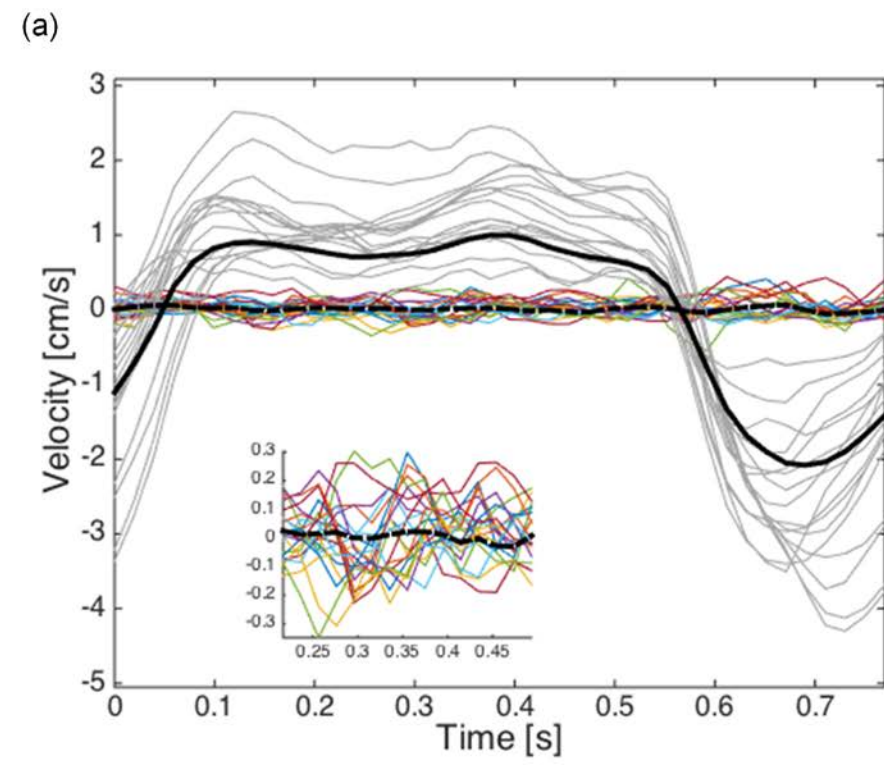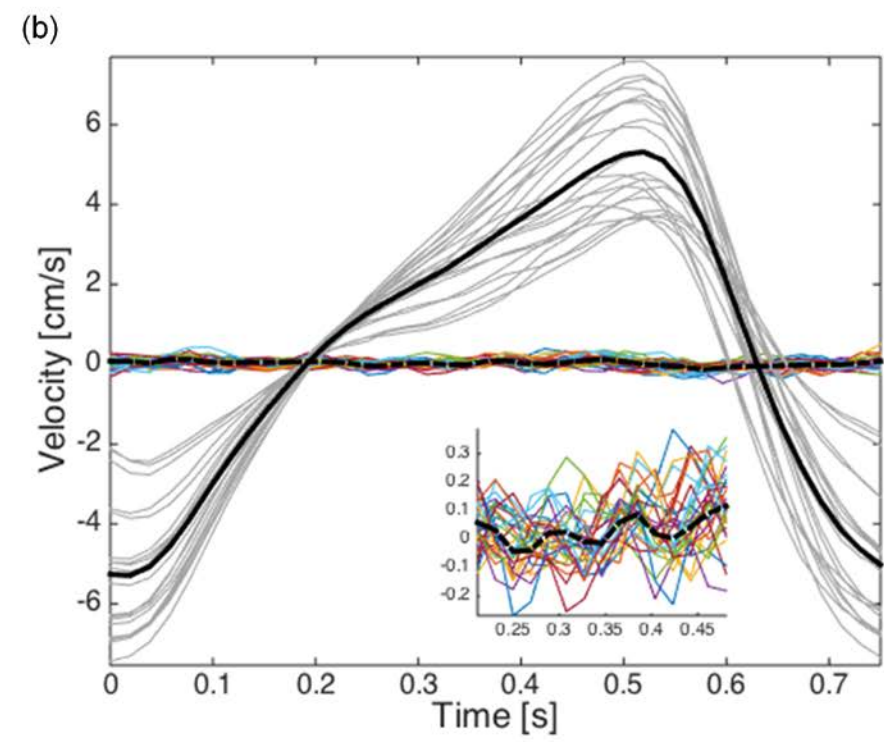

**Suppl Fig. 1. Determining mean velocities of CSF flow in CCJ and cerebral aqueduct regions (ID13).**  
For (a) the CCJ and (b) the cerebral aqueduct, the black solid line indicates mean velocity and grey lines the pixel velocities. The black dashed line indicates the mean velocity (bias) of reference ROI pixels and the colored lines pixel velocities in reference ROI (noise). Note that for CCJ only 17 pixels out of 484 pixels were included for illustrative purpose only.

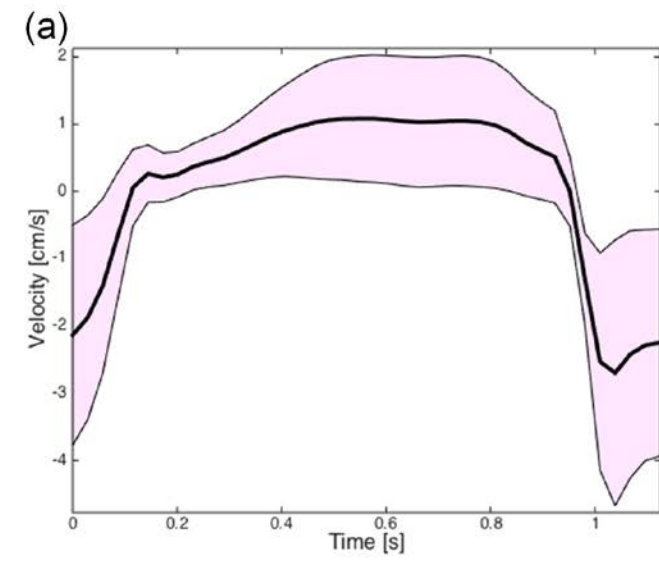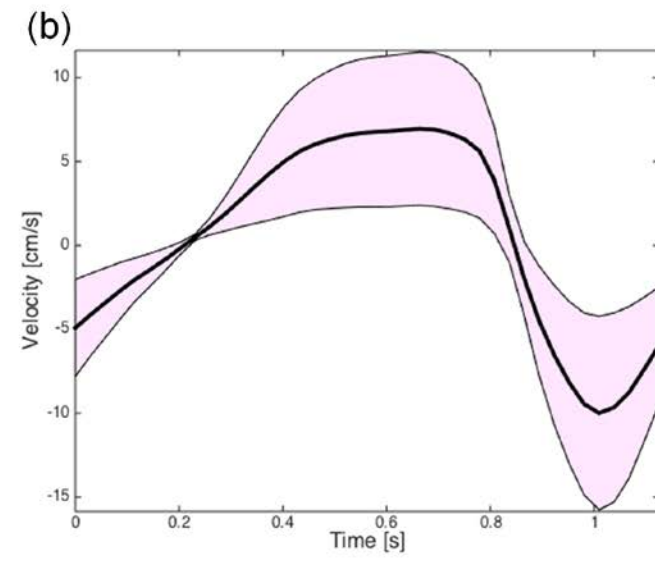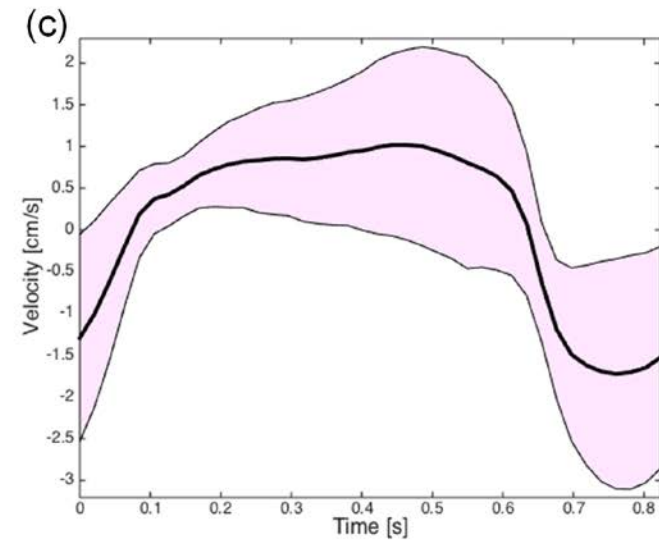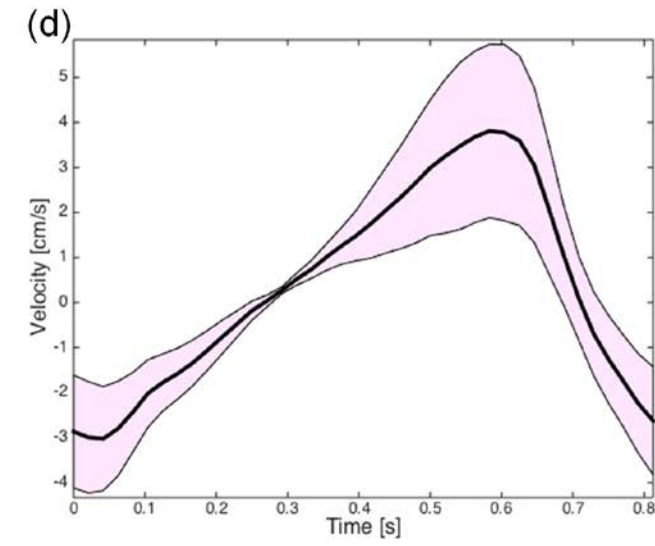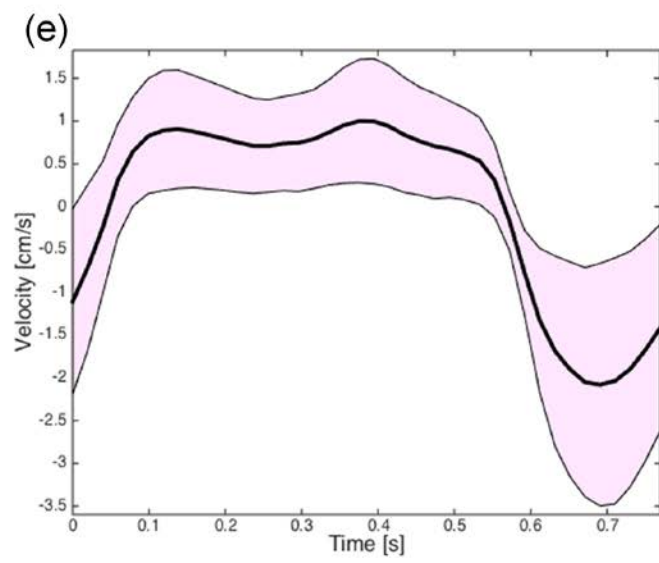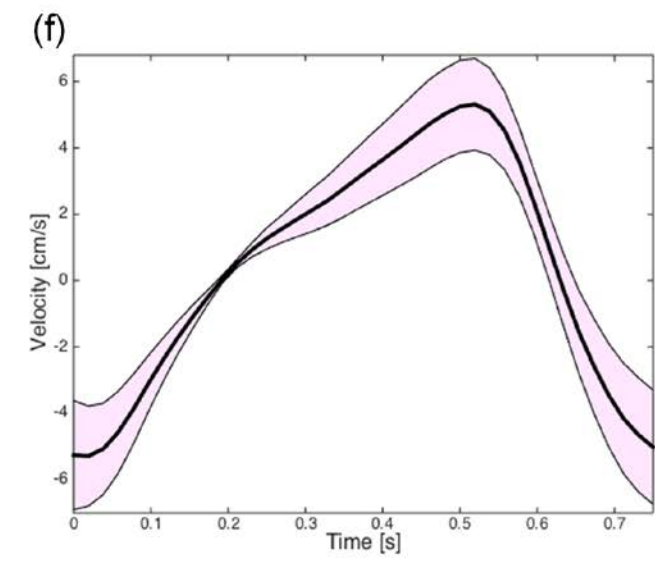

**Suppl Fig. 2. Mean and standard deviation of CSF flow velocities in CCJ and aqueduct of iNPH patients (IDs 3, 6, and 13).** The mean velocities (black line) with standard deviations (pink background) are shown for CCJ (a, c, e) and cerebral aqueduct (b, d, f) of three iNPH individuals (IDs 3 a-b, 6 c-d, and 13 e-f) to illustrate variability between cases.

**Suppl Table 1. Demographic information of individual iNPH patients and healthy subjects**

| PatID | Category | Age (yrs) | Gender |   | MRI biomarkers |                |      | iNPH category |                |              |
|-------|----------|-----------|--------|---|----------------|----------------|------|---------------|----------------|--------------|
|       |          |           | M      | F | Evan's index   | Callosal angle | DESH | Responder     | Non-responders | Conservative |
| 1     | iNPH     | 56        | 1      |   | 0.33           | 90             | 0    | 1             |                |              |
| 2     | iNPH     | 70        |        | 1 | 0.31           | 116            | 0    |               |                | 1            |
| 3     | iNPH     | 63        | 1      |   | 0.33           | 77             | 0    | 1             |                |              |
| 4     | iNPH     | 66        |        | 1 | 0.42           | 131            | 0    | 1             |                |              |
| 5     | iNPH     | 55        | 1      |   | 0.42           | 120            | 0    | 1             |                |              |
| 6     | iNPH     | 82        | 1      |   | 0.39           | 55             | 0    | 1             |                |              |
| 7     | iNPH     | 74        | 1      |   | 0.37           | 55             | 1    | 1             |                |              |
| 8     | iNPH     | 75        |        | 1 | 0.39           | 68             | 1    | 1             |                |              |
| 9     | iNPH     | 71        | 1      |   | 0.39           | 65             | 1    | 1             |                |              |
| 10    | iNPH     | 79        |        | 1 | 0.39           | 62             | 1    | 1             |                |              |
| 11    | iNPH     | 78        |        | 1 | 0.39           | 89             | 1    |               |                | 1            |
| 12    | iNPH     | 70        |        | 1 | 0.38           | 121            | 0    | 1             |                |              |
| 13    | iNPH     | 75        | 1      |   | 0.38           | 98             | 1    | 1             |                |              |
| 14    | iNPH     | 60        | 1      |   | 0.38           | 66             | 1    |               |                | 1            |
| 15    | iNPH     | 45        | 1      |   | 0.35           | 123            | 0    |               |                | 1            |
| 16    | iNPH     | 71        | 1      |   | 0.47           | 68             | 0    | 1             |                |              |
| 17    | iNPH     | 65        |        | 1 | 0.36           | 100            | 0    | 1             |                |              |
| 18    | iNPH     | 84        | 1      |   | 0.29           | 122            | 0    |               | 1              |              |
| 19    | iNPH     | 59        |        | 1 | 0.43           | 130            | 0    |               |                | 1            |
| 20    | iNPH     | 72        |        | 1 | 0.36           | 84             | 1    |               | 1              |              |
| 21    | iNPH     | 79        | 1      |   | 0.38           | 85             | 1    |               |                | 1            |
| 22    | iNPH     | 77        |        | 1 | 0.41           | 75             | 1    | 1             |                |              |
| 23    | iNPH     | 76        |        | 1 | 0.32           | 114            | 1    | 1             |                |              |
| 24    | iNPH     | 73        | 1      |   | 0.34           | 52             | 1    | 1             |                |              |
| 25    | iNPH     | 80        | 1      |   | 0.48           | 78             | 1    | 1             |                |              |
| 26    | iNPH     | 60        | 1      |   | 0.36           | 62             | 0    |               |                | 1            |
| 1     | Healthy  | 40        | 1      |   | 0.28           | 104            | 0    |               |                |              |
| 2     | Healthy  | 36        |        | 1 | 0.25           | 90             | 0    |               |                |              |
| 3     | Healthy  | 23        | 1      |   | 0.25           | 110            | 0    |               |                |              |
| 4     | Healthy  | 24        | 1      |   | 0.27           | 102            | 0    |               |                |              |

iNPH: idiopathic normal pressure hydrocephalus; DESH: disproportionately enlarged subarachnoid space hydrocephalus.

**Suppl Table 2. CSF flow volume data within CCJ of individual iNPH patients and healthy subjects**

| PatID                | Category | ROI (cm2)          | ROI (pix)            | SNR (pix-by-pix)      | dP (mmHg/cm)         | Volumetric net flow rate (ml/cycle) | Tot volumetric flow rate (ml/ cycle) | Estimated volumetric net flow rate(L/24 hrs) | Max velocity (cranial, cm/s) | Min velocity (caudal, cm/s) | <sup>a</sup> Direction of net flow |
|----------------------|----------|--------------------|----------------------|-----------------------|----------------------|-------------------------------------|--------------------------------------|----------------------------------------------|------------------------------|-----------------------------|------------------------------------|
| 1                    | iNPH     | 2.281              | 584                  | 17.687                | 0.046                | 0.176                               | 1.322                                | 17.89                                        | 0.740                        | -1.421                      | C                                  |
| 2                    | iNPH     |                    |                      |                       |                      |                                     |                                      |                                              |                              |                             |                                    |
| 3                    | iNPH     | 1.969              | 504                  | 24.271                | 0.056                | 0.180                               | 2.396                                | 13.82                                        | 1.056                        | -2.797                      | C                                  |
| 4                    | iNPH     | 1.398              | 358                  | 19.834                | 0.049                | 0.039                               | 0.988                                | 4.34                                         | 0.894                        | -1.886                      | C                                  |
| 5                    | iNPH     | 1.481              | 379                  | 20.557                | 0.070                | 0.044                               | 2.340                                | 3.55                                         | 1.384                        | -3.253                      | C                                  |
| 6                    | iNPH     | 1.352              | 346                  | 20.715                | 0.041                | 0.095                               | 1.111                                | 9.98                                         | 0.980                        | -1.772                      | C                                  |
| 7                    | iNPH     | 1.309              | 335                  | 61.026                | 0.054                | 0.139                               | 1.094                                | 14.37                                        | 1.175                        | -1.750                      | C                                  |
| 8                    | iNPH     |                    |                      |                       |                      |                                     |                                      |                                              |                              |                             |                                    |
| 9                    | iNPH     | 2.500              | 640                  | 12.935                | 0.027                | 0.249                               | 1.804                                | 20.58                                        | 0.775                        | -1.279                      | C                                  |
| 10                   | iNPH     |                    |                      |                       |                      |                                     |                                      |                                              |                              |                             |                                    |
| 11                   | iNPH     | 1.848              | 473                  | 60.143                | 0.032                | 0.292                               | 1.725                                | 26.75                                        | 1.095                        | -1.794                      | C                                  |
| 12                   | iNPH     | 1.590              | 407                  | 12.912                | 0.015                | 0.185                               | 0.532                                | 18.05                                        | 0.408                        | -0.588                      | C                                  |
| 13                   | iNPH     | 1.891              | 484                  | 19.353                | 0.044                | 0.057                               | 1.498                                | 6.42                                         | 0.986                        | -2.117                      | C                                  |
| 14                   | iNPH     | 2.133              | 546                  | 11.039                | 0.036                | 0.122                               | 1.054                                | 16.53                                        | 0.820                        | -1.407                      | C                                  |
| 15                   | iNPH     | 1.195              | 306                  | 25.916                | 0.083                | -0.040                              | 2.159                                | -3.33                                        | 2.275                        | -3.938                      | S                                  |
| 16                   | iNPH     | 1.270              | 325                  | 20.176                | 0.032                | -0.054                              | 1.444                                | 0.84                                         | 1.231                        | -2.006                      | C                                  |
| 17                   | iNPH     | 1.648              | 422                  | 26.363                | 0.045                | 0.008                               | 2.064                                | 0.67                                         | 1.049                        | -2.739                      | C                                  |
| 18                   | iNPH     | 1.879              | 481                  | 15.999                | 0.035                | 0.030                               | 1.210                                | 3.16                                         | 0.693                        | -1.342                      | C                                  |
| 19                   | iNPH     | 1.195              | 306                  | 30.028                | 0.080                | 0.010                               | 1.564                                | 1.05                                         | 1.449                        | -3.811                      | C                                  |
| 20                   | iNPH     | 1.836              | 470                  | 13.085                | 0.026                | -0.068                              | 1.448                                | -5.61                                        | 0.453                        | -1.485                      | S                                  |
| 21                   | iNPH     |                    |                      |                       |                      |                                     |                                      |                                              |                              |                             |                                    |
| 22                   | iNPH     | 1.633              | 418                  | 17.465                | 0.042                | 0.029                               | 1.278                                | 2.94                                         | 0.926                        | -1.676                      | C                                  |
| 23                   | iNPH     | 1.621              | 415                  | 7.833                 | 0.016                | -0.002                              | 0.341                                | -0.17                                        | 0.277                        | -0.643                      | S                                  |
| 24                   | iNPH     | 3.496              | 895                  | 20.786                | 0.040                | -0.009                              | 1.694                                | -1.12                                        | 0.838                        | -1.547                      | S                                  |
| 25                   | iNPH     | 1.953              | 500                  | 95.029                | 0.052                | -0.048                              | 0.989                                | -5.36                                        | 0.773                        | -1.863                      | S                                  |
| 26                   | iNPH     | 2.387              | 611                  | 103.697               | 0.039                | 0.066                               | 1.852                                | 5.66                                         | 1.006                        | -2.007                      | C                                  |
| <b>Average ± std</b> |          | <b>1.81 ± 0.53</b> | <b>463.9 ± 136.4</b> | <b>29.86 ± 26.18</b>  | <b>0.044 ± 0.018</b> | <b>0.068 ± 0.101</b>                | <b>1.450 ± 0.535</b>                 | <b>6.864 ± 9.042</b>                         | <b>0.967 ± 0.412</b>         | <b>-1.960 ± 0.873</b>       |                                    |
| 1                    | Healthy  | 0.720              | 233.2                | 34.953                | 0.093                | 0.033                               | 1.284                                | 3.27                                         | 2.371                        | -4.038                      | C                                  |
| 2                    | Healthy  | 1.350              | 437.4                | 49.013                | 0.045                | 0.014                               | 1.052                                | 1.42                                         | 1.036                        | -1.994                      | C                                  |
| 3                    | Healthy  | 1.244              | 403.0                | 48.386                | 0.065                | 0.112                               | 1.818                                | 9.02                                         | 1.800                        | -3.539                      | C                                  |
| 4                    | Healthy  | 1.530              | 495.6                | 42.174                | 0.032                | 0.164                               | 1.300                                | 11.89                                        | 0.931                        | -1.821                      | C                                  |
| <b>Average ± std</b> |          | <b>1.21 ± 0.35</b> | <b>392.3 ± 112.7</b> | <b>43.631 ± 6.558</b> | <b>0.059 ± 0.027</b> | <b>0.081 ± 0.070</b>                | <b>1.363 ± 0.323</b>                 | <b>6.399 ± 4.881</b>                         | <b>1.534 ± 0.679</b>         | <b>-2.848 ± 1.107</b>       |                                    |

<sup>a</sup>Direction of net flow: C=Cranially directed; S=Spinally directed. ROI (cm2): Size of region of interest in cm<sup>2</sup>. ROI (pix): Size of region of interest in number of pixels. SNR (pix-by-pix): Signal to noise ratio calculated pixel by pixel. dP (mmHg/cm): Pressure gradient calculated from PC-MRI measurements. Net vol/cycle (ml): Bias corrected net volume of CSF during one cardiac cycle. Tot vol/cycle (ml): Bias corrected total volume of CSF during one cardiac cycle. Net vol/day (l): Sum of net vol/cycle during 24 hours. Max velocity (cranial, cm/s): Peak velocity in cranial direction extracted from mean velocities. Min velocity (caudal, cm/s): Peak velocity in caudal direction extracted from mean velocities.

**Suppl Table 3. CSF flow volume data within cerebral aqueduct of individual iNPH patients and healthy subjects**

| PatID                | Category | ROI (cm2)             | ROI (pix)              | SNR (pix-by-pix)      | dP (mmHg/cm)         | Volumetric net flow rate (ml/cycle) | Tot volumetric flow rate (ml/ cycle) | Estimated volumetric net flow rate (L/24 hrs) | Max velocity (cranial, cm/s) | Min velocity (caudal, cm/s) | <sup>a</sup> Direction of net flow |
|----------------------|----------|-----------------------|------------------------|-----------------------|----------------------|-------------------------------------|--------------------------------------|-----------------------------------------------|------------------------------|-----------------------------|------------------------------------|
| 1                    | iNPH     | 0.150                 | 50                     | 23.105                | 0.057                | 0.016                               | 0.194                                | 1.66                                          | 2.073                        | -3.315                      | R                                  |
| 2                    | iNPH     | 0.108                 | 36                     | 29.161                | 0.073                | -0.002                              | 0.272                                | -0.22                                         | 4.511                        | -5.608                      | A                                  |
| 3                    | iNPH     | 0.117                 | 39                     | 33.569                | 0.138                | 0.072                               | 0.659                                | 5.53                                          | 6.941                        | -9.899                      | R                                  |
| 4                    | iNPH     |                       |                        |                       |                      |                                     |                                      |                                               |                              |                             |                                    |
| 5                    | iNPH     |                       |                        |                       |                      |                                     |                                      |                                               |                              |                             |                                    |
| 6                    | iNPH     | 0.108                 | 36                     | 24.264                | 0.061                | 0.034                               | 0.169                                | 3.59                                          | 3.778                        | -3.003                      | R                                  |
| 7                    | iNPH     | 0.093                 | 31                     | 23.344                | 0.097                | 0.021                               | 0.211                                | 2.20                                          | 5.213                        | -4.574                      | R                                  |
| 8                    | iNPH     | 0.096                 | 32                     | 30.715                | 0.091                | 0.024                               | 0.280                                | 2.30                                          | 4.719                        | -6.097                      | R                                  |
| 9                    | iNPH     | 0.066                 | 22                     | 30.212                | 0.087                | 0.020                               | 0.286                                | 1.66                                          | 6.446                        | -7.690                      | R                                  |
| 10                   | iNPH     | 0.048                 | 16                     | 30.496                | 0.132                | 0.009                               | 0.142                                | 1.17                                          | 6.289                        | -7.439                      | R                                  |
| 11                   | iNPH     | 0.030                 | 10                     | 25.630                | 0.041                | 0.006                               | 0.057                                | 0.53                                          | 3.566                        | -3.440                      | R                                  |
| 12                   | iNPH     |                       |                        |                       |                      |                                     |                                      |                                               |                              |                             |                                    |
| 13                   | iNPH     | 0.063                 | 21                     | 28.615                | 0.089                | 0.023                               | 0.144                                | 2.63                                          | 5.312                        | -5.326                      | R                                  |
| 14                   | iNPH     | 0.233                 | 78                     | 22.561                | 0.050                | -0.002                              | 0.270                                | -0.25                                         | 3.431                        | -3.027                      | A                                  |
| 15                   | iNPH     |                       |                        |                       |                      |                                     |                                      |                                               |                              |                             |                                    |
| 16                   | iNPH     | 0.269                 | 90                     | 30.532                | 0.089                | 0.044                               | 1.072                                | 3.98                                          | 5.813                        | -7.450                      | R                                  |
| 17                   | iNPH     | 0.075                 | 25                     | 33.143                | 0.111                | 0.049                               | 0.375                                | 3.92                                          | 6.435                        | -9.505                      | R                                  |
| 18                   | iNPH     | 0.075                 | 25                     | 32.163                | 0.089                | 0.004                               | 0.193                                | 0.39                                          | 4.472                        | -5.914                      | R                                  |
| 19                   | iNPH     |                       |                        |                       |                      |                                     |                                      |                                               |                              |                             |                                    |
| 20                   | iNPH     | 0.096                 | 32                     | 36.264                | 0.201                | 0.019                               | 0.753                                | 1.58                                          | 9.626                        | -15.983                     | R                                  |
| 21                   | iNPH     | 0.108                 | 36                     | 28.266                | 0.111                | -0.037                              | 0.338                                | -4.10                                         | 5.954                        | -7.322                      | A                                  |
| 22                   | iNPH     | 0.153                 | 51                     | 32.400                | 0.116                | -0.009                              | 0.605                                | -0.89                                         | 6.720                        | -9.147                      | A                                  |
| 23                   | iNPH     | 0.040                 | 17                     | 12.907                | 0.041                | -0.003                              | 0.043                                | -0.27                                         | 1.465                        | -2.426                      | A                                  |
| 24                   | iNPH     | 0.076                 | 32                     | 29.583                | 0.188                | 0.001                               | 0.331                                | 0.08                                          | 7.838                        | -11.553                     | R                                  |
| 25                   | iNPH     | 0.069                 | 29                     | 16.205                | 0.070                | -0.001                              | 0.117                                | -0.11                                         | 3.181                        | -4.165                      | A                                  |
| 26                   | iNPH     | 0.028                 | 12                     | 29.269                | 0.103                | -0.028                              | 0.140                                | -2.45                                         | 5.468                        | -11.161                     | A                                  |
| <b>Average ± std</b> |          | <b>0.100 ± 0.061</b>  | <b>34.286 ± 19.807</b> | <b>27.734 ± 5.716</b> | <b>0.097 ± 0.042</b> | <b>0.012 ± 0.025</b>                | <b>0.317 ± 0.256</b>                 | <b>1.091 ± 2.239</b>                          | <b>5.202 ± 1.924</b>         | <b>-6.859 ± 3.451</b>       |                                    |
| 1                    | Healthy  | 0.023                 | 9.8                    | 21.887                | 0.058                | -0.002                              | 0.047                                | -0.24                                         | 3.777                        | -4.198                      | A                                  |
| 2                    | Healthy  | 0.017                 | 7.2                    | 16.443                | 0.032                | -0.003                              | 0.017                                | -0.34                                         | 1.712                        | -2.125                      | A                                  |
| 3                    | Healthy  | 0.038                 | 16                     | 24.241                | 0.096                | -0.002                              | 0.113                                | -0.22                                         | 6.122                        | -4.867                      | A                                  |
| 4                    | Healthy  | 0.014                 | 6                      | 14.750                | 0.032                | -0.003                              | 0.018                                | -0.26                                         | 1.423                        | -2.371                      | A                                  |
| <b>Average ± std</b> |          | <b>0.0238 ± 0.011</b> | <b>9.75 ± 4.46</b>     | <b>19.330 ± 4.471</b> | <b>0.055 ± 0.031</b> | <b>-0.003 ± 0.001</b>               | <b>0.049 ± 0.045</b>                 | <b>-0.263 ± 0.051</b>                         | <b>3.259 ± 2.178</b>         | <b>-3.390 ± 1.351</b>       |                                    |

<sup>a</sup>Direction of net flow: A=Antegrade; R=Retrograde.

**Suppl Table 4. CSF flow volume data within CCJ of healthy subjects for repeated MRI acquisitions**

| PatID                | MRI scan no | ROI (cm2)            | ROI (pix)           | SNR (pix-by-pix)      | dP (mmHg/cm)         | Volumetric net flow rate (ml/cycle) | Tot volumetric flow rate (ml/ cycle) | Estimated volumetric net flow rate (L/24 hrs) | Max velocity (cranial, cm/s) | Min velocity (caudal, cm/s) | <sup>a</sup> Direction of net flow |
|----------------------|-------------|----------------------|---------------------|-----------------------|----------------------|-------------------------------------|--------------------------------------|-----------------------------------------------|------------------------------|-----------------------------|------------------------------------|
| 1                    | 1           | 0.787                | 255                 | 30.730                | 0.100                | 0.001                               | 1.340                                | 0.085                                         | 2.195                        | -4.226                      | C                                  |
|                      | 2           | 0.688                | 223                 | 31.049                | 0.094                | 0.029                               | 1.238                                | 2.899                                         | 2.530                        | -4.128                      | C                                  |
|                      | 3           | 0.731                | 237                 | 35.978                | 0.093                | 0.106                               | 1.162                                | 10.577                                        | 2.198                        | -3.791                      | C                                  |
|                      | 4           | 0.698                | 226                 | 32.070                | 0.092                | -0.046                              | 1.346                                | -4.377                                        | 2.376                        | -4.097                      | S                                  |
|                      | 5           | 0.694                | 225                 | 44.937                | 0.085                | 0.077                               | 1.334                                | 7.185                                         | 2.556                        | -3.949                      | C                                  |
| <b>Average ± std</b> |             | <b>0.720 ± 0.041</b> | <b>233.2 ± 13.3</b> | <b>34.953 ± 5.960</b> | <b>0.093 ± 0.005</b> | <b>0.033 ± 0.060</b>                | <b>1.284 ± 0.081</b>                 | <b>3.274 ± 5.863</b>                          | <b>2.371 ± 0.174</b>         | <b>-4.038 ± 0.170</b>       |                                    |
| 2                    | 1           | 1.219                | 395                 | 49.456                | 0.034                | 0.047                               | 0.984                                | 4.357                                         | 1.078                        | -1.851                      | C                                  |
|                      | 2           | 1.441                | 467                 | 48.130                | 0.043                | -0.014                              | 1.194                                | -1.335                                        | 1.031                        | -2.100                      | S                                  |
|                      | 3           | 1.429                | 463                 | 49.249                | 0.048                | 0.011                               | 1.190                                | 1.045                                         | 0.965                        | -2.069                      | C                                  |
|                      | 4           | 1.219                | 395                 | 50.008                | 0.050                | 0.039                               | 0.826                                | 4.376                                         | 1.078                        | -1.851                      | C                                  |
|                      | 5           | 1.441                | 467                 | 48.222                | 0.049                | -0.012                              | 1.064                                | -1.327                                        | 1.031                        | -2.100                      | S                                  |
| <b>Average ± std</b> |             | <b>1.350 ± 0.120</b> | <b>437.4 ± 38.7</b> | <b>49.013 ± 0.814</b> | <b>0.045 ± 0.007</b> | <b>0.014 ± 0.028</b>                | <b>1.052 ± 0.154</b>                 | <b>1.423 ± 2.856</b>                          | <b>1.036 ± 0.046</b>         | <b>-1.994 ± 0.131</b>       |                                    |
| 3                    | 1           | 1.420                | 460                 | 42.834                | 0.052                | 0.011                               | 1.880                                | 1.038                                         | 1.638                        | -3.159                      | C                                  |
|                      | 2           | 1.262                | 409                 | 45.313                | 0.042                | 0.287                               | 1.956                                | 22.165                                        | 1.537                        | -2.910                      | C                                  |
|                      | 3           | 1.324                | 429                 | 49.141                | 0.079                | 0.021                               | 1.475                                | 2.144                                         | 1.880                        | -3.329                      | C                                  |
|                      | 4           | 1.099                | 356                 | 51.806                | 0.074                | 0.113                               | 1.961                                | 8.703                                         | 2.026                        | -4.137                      | C                                  |
|                      | 5           | 1.114                | 361                 | 52.835                | 0.079                | 0.130                               | 1.817                                | 11.026                                        | 1.918                        | -4.158                      | C                                  |
| <b>Average ± std</b> |             | <b>1.244 ± 0.137</b> | <b>403.0 ± 44.5</b> | <b>48.386 ± 4.252</b> | <b>0.065 ± 0.017</b> | <b>0.112 ± 0.111</b>                | <b>1.818 ± 0.201</b>                 | <b>9.015 ± 8.484</b>                          | <b>1.800 ± 0.204</b>         | <b>-3.539 ± 0.576</b>       |                                    |
| 4                    | 1           | 1.698                | 550                 | 43.470                | 0.031                | 0.183                               | 1.376                                | 13.577                                        | 0.876                        | -1.812                      | C                                  |
|                      | 2           | 1.401                | 454                 | 42.794                | 0.032                | 0.195                               | 1.217                                | 14.790                                        | 1.024                        | -1.833                      | C                                  |
|                      | 3           | 1.389                | 450                 | 45.158                | 0.038                | 0.069                               | 1.218                                | 5.109                                         | 0.973                        | -2.005                      | C                                  |
|                      | 4           | 1.534                | 497                 | 36.143                | 0.027                | 0.186                               | 1.309                                | 12.448                                        | 0.798                        | -1.623                      | C                                  |
|                      | 5           | 1.627                | 527                 | 43.303                | 0.030                | 0.189                               | 1.380                                | 13.502                                        | 0.984                        | -1.835                      | C                                  |
| <b>Average ± std</b> |             | <b>1.530 ± 0.136</b> | <b>495.6 ± 44.0</b> | <b>42.174 ± 3.486</b> | <b>0.032 ± 0.004</b> | <b>0.164 ± 0.054</b>                | <b>1.300 ± 0.081</b>                 | <b>11.885 ± 3.878</b>                         | <b>0.931 ± 0.092</b>         | <b>-1.821 ± 0.136</b>       |                                    |

<sup>a</sup>Direction of net flow: A=Antegrade; R=Retrograde.

**Suppl Table 5. CSF flow volume data within cerebral aqueduct of healthy subjects for repeated MRI acquisitions**

| PatID                | MRI scan no | ROI (cm2)            | ROI (pix)         | SNR (pix-by-pix)      | dP (mmHg/cm)         | Volumetric net flow rate (ml/cycle) | Tot volumetric flow rate (ml/ cycle) | Estimated volumetric net flow rate (L/24 hrs) | Max velocity (cranial, cm/s) | Min velocity (caudal, cm/s) | <sup>a</sup> Direction of net flow |
|----------------------|-------------|----------------------|-------------------|-----------------------|----------------------|-------------------------------------|--------------------------------------|-----------------------------------------------|------------------------------|-----------------------------|------------------------------------|
| 1                    | 1           | 0.021                | 9                 | 23.008                | 0.065                | -0.002                              | 0.046                                | -0.187                                        | 4.092                        | -4.598                      | A                                  |
|                      | 2           | 0.021                | 9                 | 21.847                | 0.057                | 0.000                               | 0.043                                | -0.017                                        | 3.891                        | -4.241                      | A                                  |
|                      | 3           | 0.021                | 9                 | 22.080                | 0.063                | -0.006                              | 0.042                                | -0.636                                        | 3.698                        | -4.564                      | A                                  |
|                      | 4           | 0.024                | 10                | 22.031                | 0.056                | -0.002                              | 0.049                                | -0.176                                        | 3.776                        | -4.021                      | A                                  |
|                      | 5           | 0.028                | 12                | 20.467                | 0.050                | -0.002                              | 0.054                                | -0.195                                        | 3.427                        | -3.567                      | A                                  |
| <b>Average ± std</b> |             | <b>0.023 ± 0.003</b> | <b>9.8 ± 1.3</b>  | <b>21.887 ± 0.912</b> | <b>0.058 ± 0.006</b> | <b>-0.002 ± 0.002</b>               | <b>0.047 ± 0.005</b>                 | <b>-0.242 ± 0.232</b>                         | <b>3.777 ± 0.245</b>         | <b>-4.198 ± 0.426</b>       |                                    |
| 2                    | 1           | 0.017                | 7                 | 15.593                | 0.028                | -0.003                              | 0.016                                | -0.299                                        | 1.541                        | -2.004                      | A                                  |
|                      | 2           | 0.017                | 7                 | 16.854                | 0.028                | -0.005                              | 0.017                                | -0.496                                        | 1.536                        | -2.159                      | A                                  |
|                      | 3           | 0.017                | 7                 | 16.398                | 0.032                | -0.005                              | 0.017                                | -0.483                                        | 1.567                        | -2.047                      | A                                  |
|                      | 4           | 0.019                | 8                 | 15.940                | 0.033                | -0.003                              | 0.016                                | -0.289                                        | 1.810                        | -2.145                      | A                                  |
|                      | 5           | 0.017                | 7                 | 17.431                | 0.036                | -0.001                              | 0.016                                | -0.115                                        | 2.108                        | -2.268                      | A                                  |
| <b>Average ± std</b> |             | <b>0.017 ± 0.001</b> | <b>7.2 ± 0.4</b>  | <b>16.443 ± 0.729</b> | <b>0.032 ± 0.003</b> | <b>-0.003 ± 0.002</b>               | <b>0.017 ± 0.001</b>                 | <b>-0.336 ± 0.158</b>                         | <b>1.712 ± 0.249</b>         | <b>-2.125 ± 0.104</b>       |                                    |
| 3                    | 1           | 0.040                | 17                | 23.271                | 0.092                | -0.002                              | 0.097                                | -0.171                                        | 5.771                        | -4.375                      | A                                  |
|                      | 2           | 0.038                | 16                | 24.999                | 0.098                | -0.003                              | 0.108                                | -0.324                                        | 6.275                        | -5.121                      | A                                  |
|                      | 3           | 0.033                | 14                | 23.809                | 0.106                | -0.009                              | 0.083                                | -0.983                                        | 6.377                        | -4.810                      | A                                  |
|                      | 4           | 0.040                | 17                | 22.733                | 0.087                | 0.002                               | 0.112                                | 0.223                                         | 5.648                        | -3.838                      | R                                  |
|                      | 5           | 0.038                | 16                | 26.390                | 0.098                | 0.002                               | 0.166                                | 0.167                                         | 6.542                        | -6.192                      | R                                  |
| <b>Average ± std</b> |             | <b>0.038 ± 0.003</b> | <b>16.0 ± 1.2</b> | <b>24.241 ± 1.466</b> | <b>0.096 ± 0.007</b> | <b>-0.002 ± 0.005</b>               | <b>0.113 ± 0.032</b>                 | <b>-0.218 ± 0.485</b>                         | <b>6.122 ± 0.391</b>         | <b>-4.867 ± 0.884</b>       |                                    |
| 4                    | 1           | 0.014                | 6                 | 14.814                | 0.032                | -0.004                              | 0.019                                | -0.310                                        | 1.340                        | -2.623                      | A                                  |
|                      | 2           | 0.014                | 6                 | 14.680                | 0.028                | -0.003                              | 0.017                                | -0.199                                        | 1.380                        | -2.049                      | A                                  |
|                      | 3           | 0.014                | 6                 | 15.052                | 0.037                | -0.004                              | 0.017                                | -0.323                                        | 1.621                        | -2.364                      | A                                  |
|                      | 4           | 0.014                | 6                 | 14.429                | 0.030                | -0.002                              | 0.017                                | -0.168                                        | 1.348                        | -2.325                      | A                                  |
|                      | 5           | 0.014                | 6                 | 14.772                | 0.033                | -0.004                              | 0.020                                | -0.277                                        | 1.424                        | -2.492                      | A                                  |
| <b>Average ± std</b> |             | <b>0.014 ± 0.000</b> | <b>6.0 ± 0.0</b>  | <b>14.750 ± 0.226</b> | <b>0.032 ± 0.003</b> | <b>-0.003 ± 0.001</b>               | <b>0.018 ± 0.001</b>                 | <b>-0.255 ± 0.069</b>                         | <b>1.423 ± 0.116</b>         | <b>-2.371 ± 0.214</b>       |                                    |

<sup>a</sup>Direction of net flow: A=Antegrade; R=Retrograde.



**Suppl Table 6. ICP scores for individual iNPH patients.**

| PatID                | Category | Mean ICP         |                                | MWA              |                              |
|----------------------|----------|------------------|--------------------------------|------------------|------------------------------|
|                      |          | Average (mmHg)   | Percentage >15 mmHg for 30 sec | Average (mmHg)   | Percentage >5 mmHg for 6 sec |
| 1                    | iNPH     | 10.2             | 2                              | 4.5              | 26                           |
| 2                    | iNPH     | 7.7              | 0                              | 5.2              | 58                           |
| 3                    | iNPH     | 4.4              | 0                              | 3.9              | 20                           |
| 4                    | iNPH     | 4.6              | 0                              | 4.0              | 14                           |
| 5                    | iNPH     | 6.0              | 1                              | 4.0              | 10                           |
| 6                    | iNPH     | 3.4              | 0                              | 4.7              | 27                           |
| 7                    | iNPH     | 11.9             | 2                              | 7.4              | 100                          |
| 8                    | iNPH     | 8.2              | 0                              | 6.3              | 70                           |
| 9                    | iNPH     | 3.5              | 0                              | 5.7              | 70                           |
| 10                   | iNPH     | 6.6              | 0                              | 7.9              | 96                           |
| 11                   | iNPH     | 3.8              | 0                              | 3.1              | 2                            |
| 12                   | iNPH     | 6.7              | 0                              | 5.7              | 71                           |
| 13                   | iNPH     | 5.6              | 0                              | 4.3              | 16                           |
| 14                   | iNPH     | 3.0              | 0                              | 3.4              | 4                            |
| 15                   | iNPH     | 5.9              | 1                              | 2.3              | 1                            |
| 16                   | iNPH     | 9.7              | 2                              | 3.9              | 22                           |
| 17                   | iNPH     | 10.6             | 0                              | 4.2              | 11                           |
| 18                   | iNPH     | 6.5              | 0                              | 3.5              | 2                            |
| 19                   | iNPH     | 8.5              | 4                              | 7.2              | 88                           |
| 20                   | iNPH     | -1.8             | 0                              | 4.3              | 16                           |
| 21                   | iNPH     | 8.8              | 0                              | 3.5              | 1                            |
| 22                   | iNPH     | 7.3              | 0                              | 4.3              | 23                           |
| 23                   | iNPH     | 5.1              | 0                              | 5.9              | 76                           |
| 24                   | iNPH     | 6.1              | 0                              | 7.2              | 92                           |
| 25                   | iNPH     | 10.3             | 15                             | 4.9              | 42                           |
| 26                   | iNPH     | 9.8              | 9                              | 3.6              | 5                            |
| <b>Average ± std</b> |          | <b>6.6 ± 3.0</b> | <b>1.4 ± 3.4</b>               | <b>4.8 ± 1.5</b> | <b>37.1 ± 34.3</b>           |
